# Supplementary material for: Design of polyurethane composite foam obtained from industrial PET wastes and MXenes for EMI shielding applications
Source: Royal Society of Chemistry journal article supplement (doi:10.1039/d4ra07447e), 2024-01-01
Supplement: d4ra07447e1.pdf [file d4ra07447e1.pdf]

## Design of polyurethane composite foam obtained from industrial PET wastes and MXenes for EMI shielding applications (supplementary file)

Edina Rusen<sup>1†\*</sup>, Alexandra Mocanu<sup>1,2†</sup>, Gabriela Toader<sup>3†</sup>, Aurel Diacon<sup>3</sup>, Cosmin Romanitan<sup>2</sup>, Ovidiu Iorga<sup>4</sup>, Martino Aldrigo<sup>2</sup>, Catalin Parvulescu<sup>2</sup>, Raul Mitran<sup>5</sup>, Oana Brincoveanu<sup>2,6</sup>

<sup>1</sup>Faculty of Chemical Engineering and Biotechnologies, National University of Science and Technology Politehnica Bucharest, 1-7 Gh. Polizu Street, Bucharest, 011061, Romania

<sup>2</sup>National Institute for Research and Development in Microtechnologies—IMT Bucharest, 126A Erou Iancu Nicolae Street, 077190 Bucharest, Romania

<sup>3</sup>Military Technical Academy „Ferdinand I”, 39-49 G. Cosbuc Blvd., Bucharest, 050141, Romania

<sup>4</sup>Research and Innovation Center for CBRN Defense and Ecology, 225 Oltenitei Avenue, District 4, Bucharest, Romania

<sup>5</sup>“Ilie Murgulescu” Institute of Physical Chemistry, Romanian Academy, 202 Splaiul Independentei, Bucharest, 060021, Romania

<sup>6</sup>Research Institute of the University of Bucharest, ICUB Bucharest, Soseaua Panduri, nr. 90, Sector 5, 050663, Bucharest, Romania

† Co-authors equally contributed to this study

Corresponding authors: Edina Rusen [edina\\_rusen@yahoo.com](mailto:edina_rusen@yahoo.com):

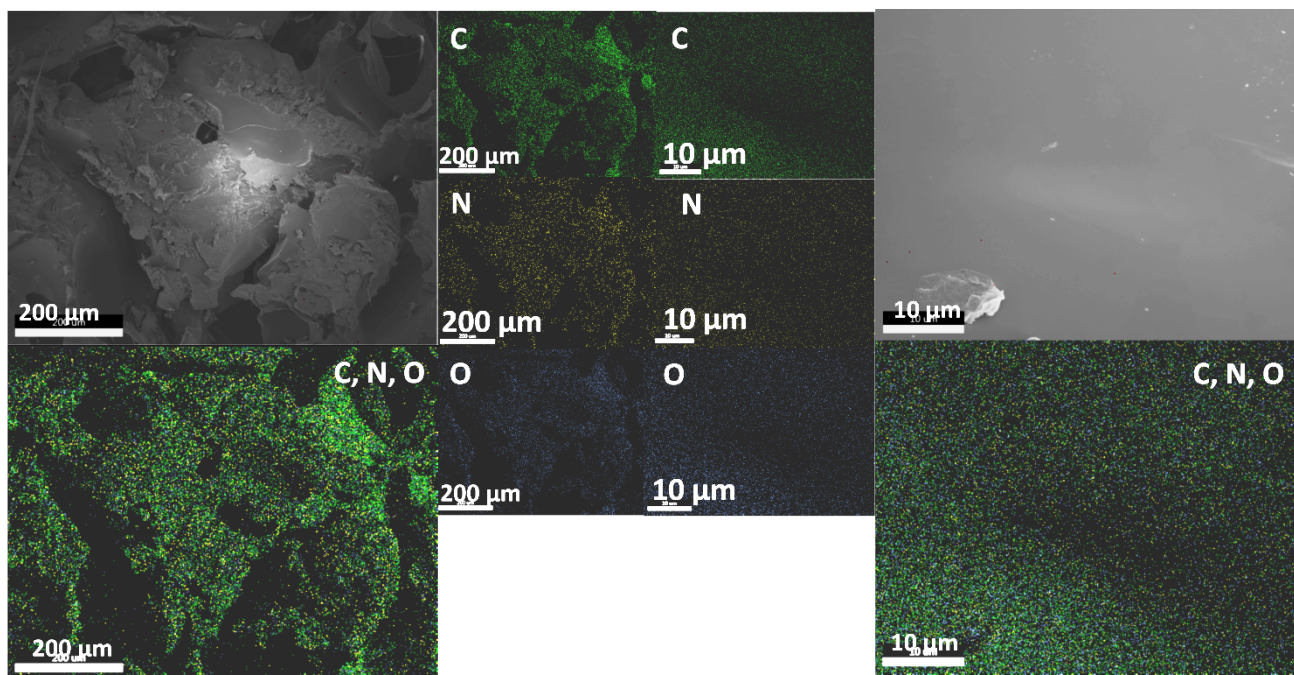

(a)

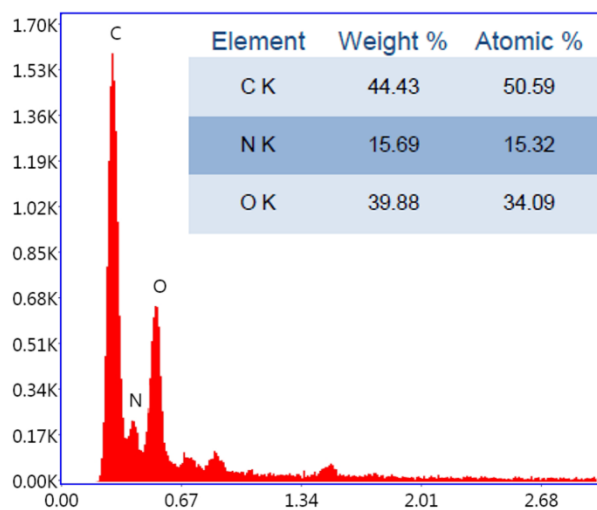

**Figure S1.** EDX map and elements distribution at 200 and 10 microns (a), and spectrum and element quantification (b) for Sample 0

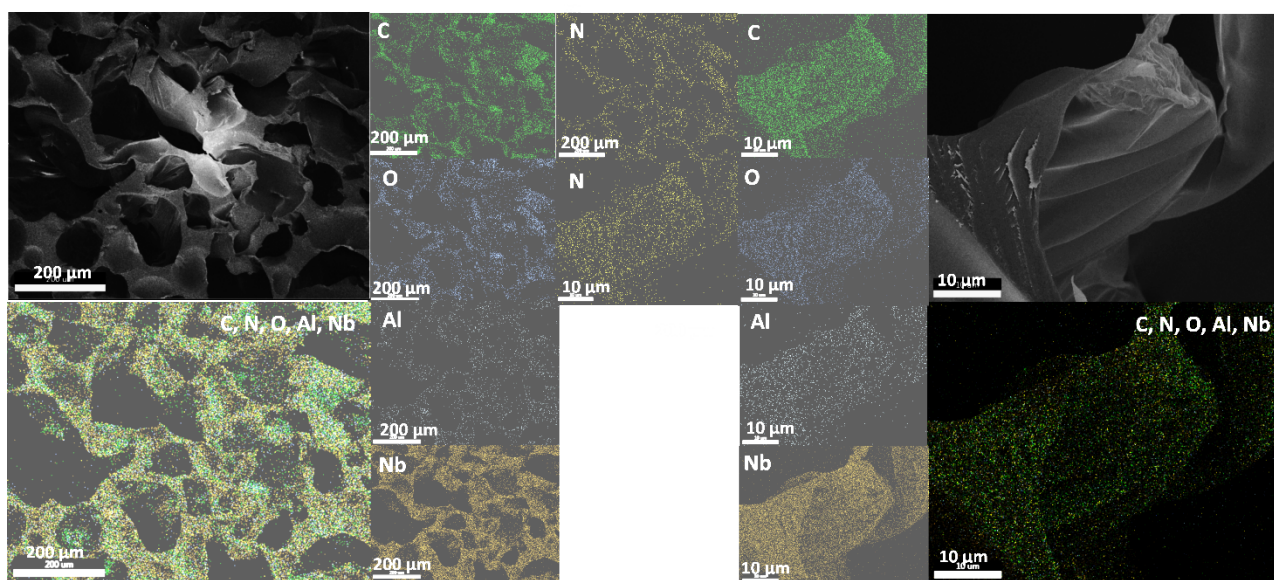

a)

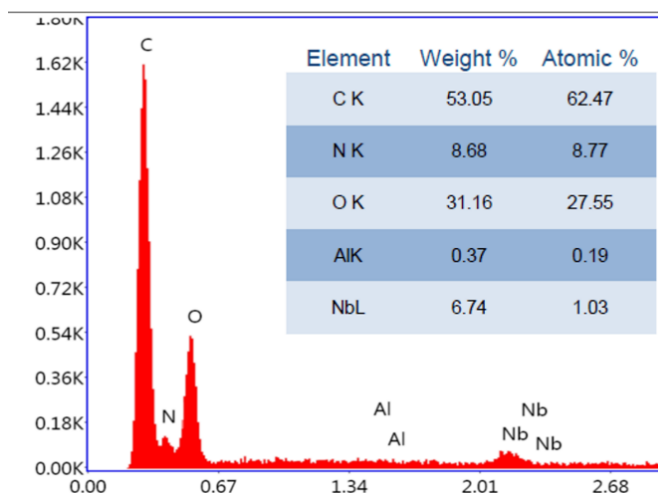

b)

**Figure S2.** EDX map and elements distribution at 200 and 10 microns (a), and spectrum and element quantification (b) for Sample A

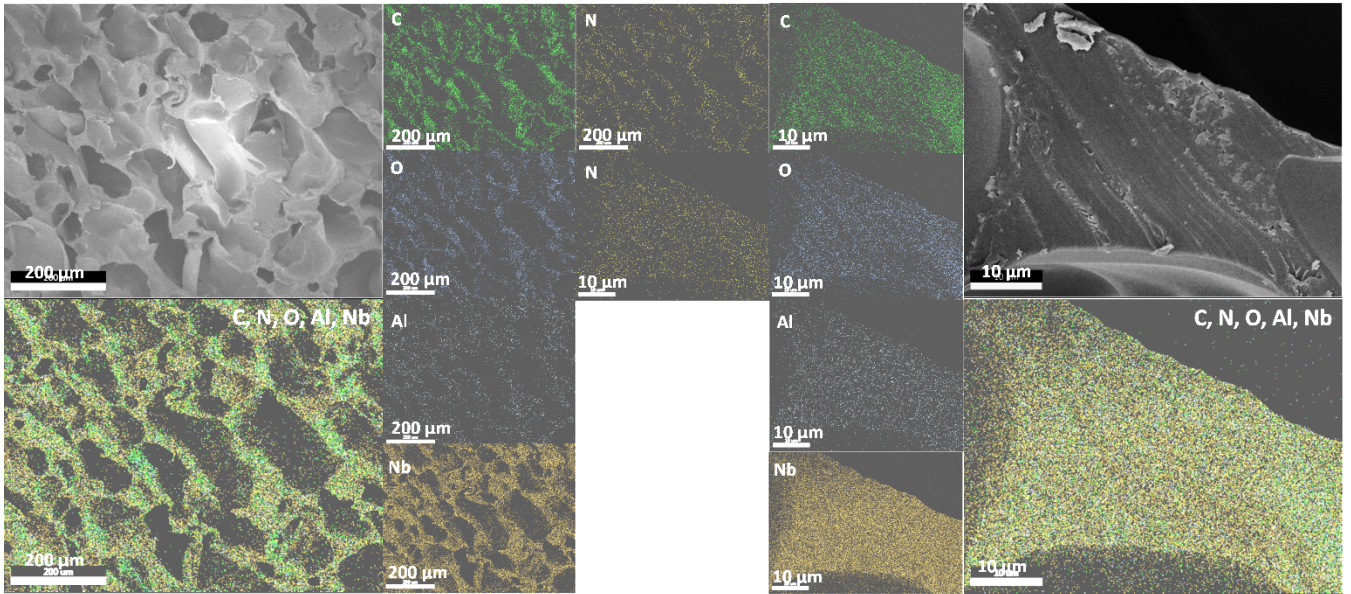

(a)

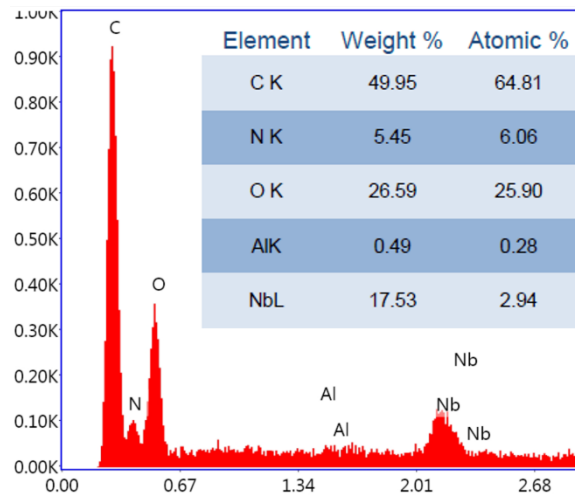

(b)

**Figure S3.** EDX map and elements distribution at 200 and 10 microns (a), and spectrum and element quantification (b) for Sample B



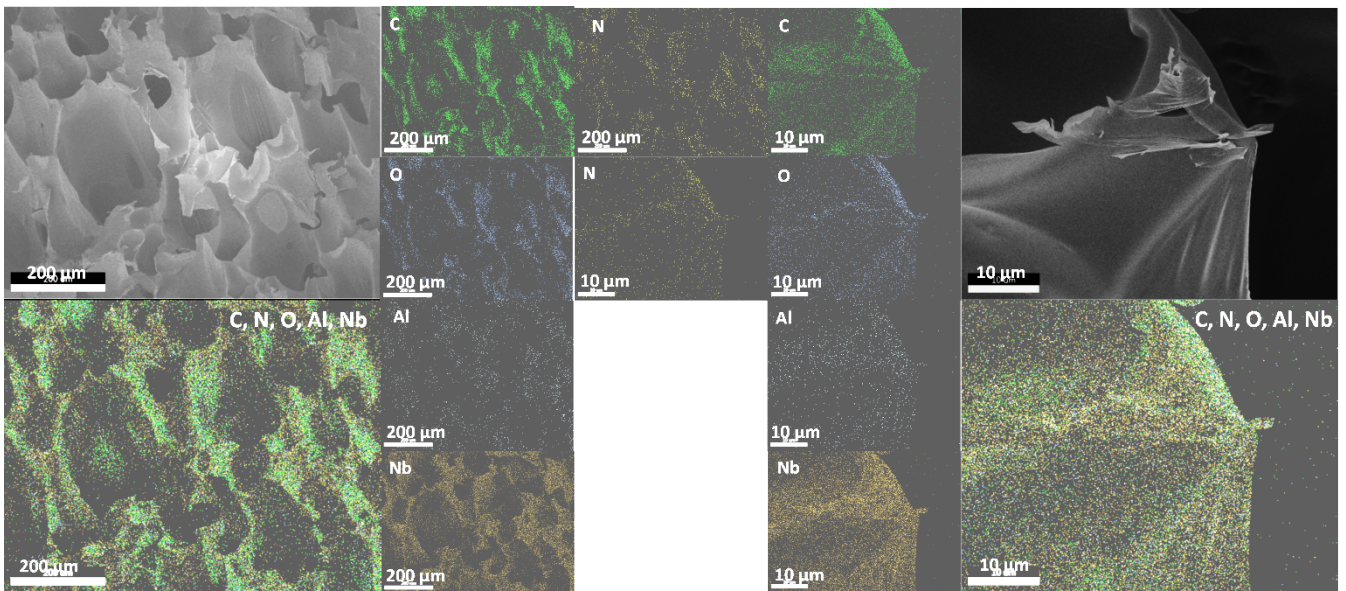

(a)

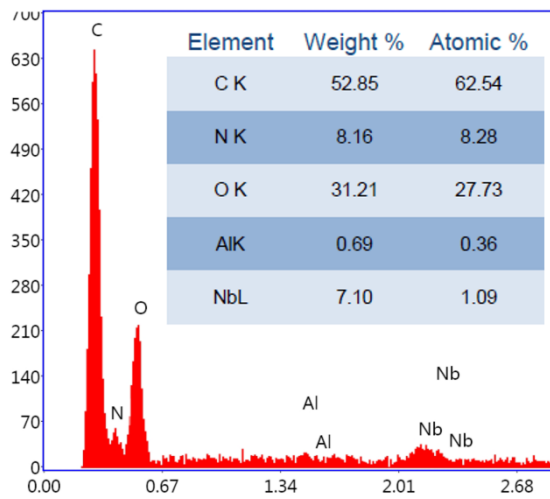

(b)

**Figure S4.** EDX map and elements distribution at 200 and 10 microns (a), and spectrum and element quantification (b) for Sample C
